# Supplementary material
Source: publisher site journal article supplement (https://www.spandidos-publications.com/7244/downloadSupplementary)

Figure S1. Kaplan-Meier curves showing progression-free survival according to the occurrence of (A) any irAEs or (B) hepatic irAEs. Log-rank tests were used to compare survival curves. HR, hazard ratio; irAE, immune-related adverse event.

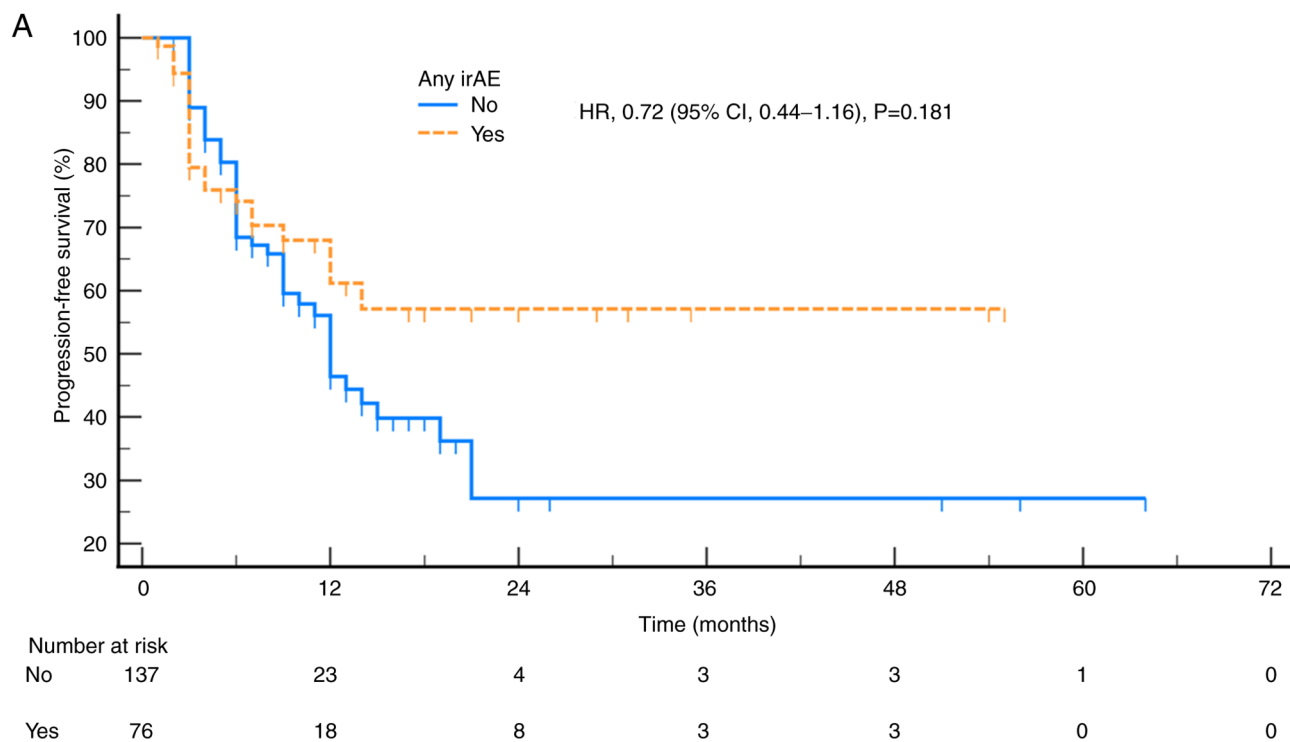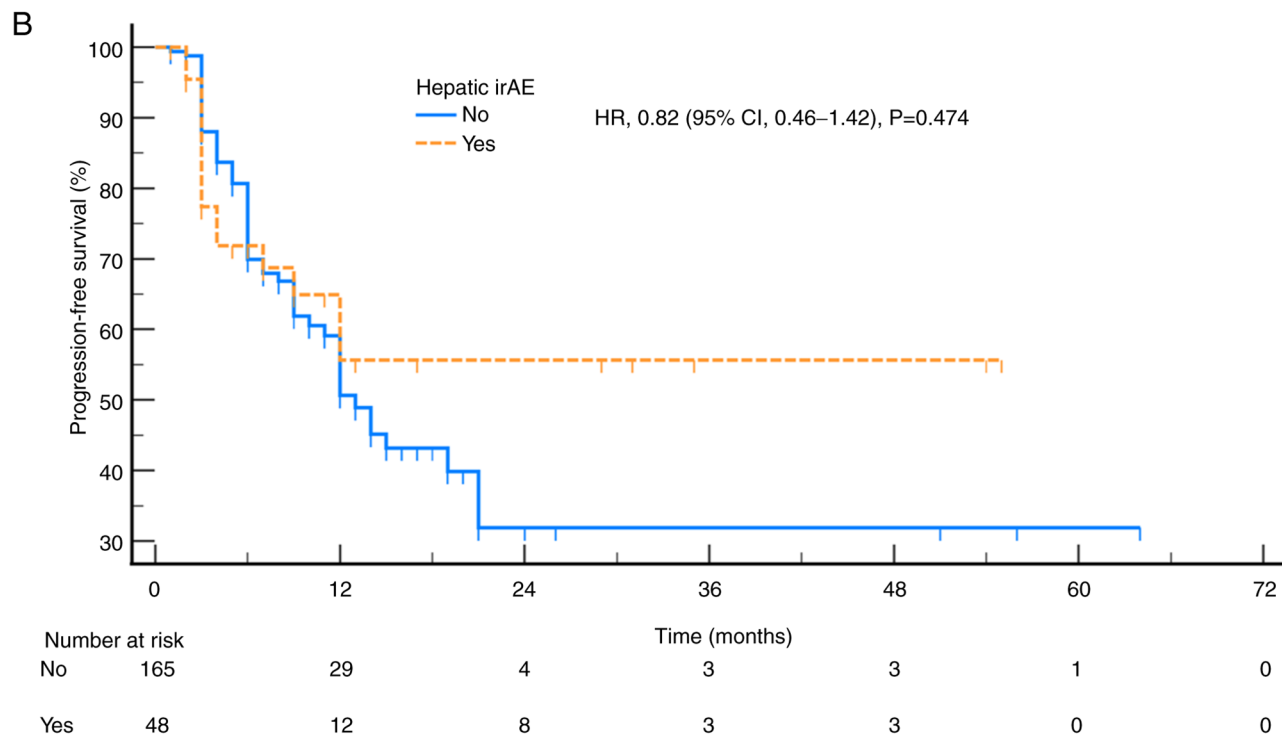

Supplement: Supplementary file 1 [file downloadSupplementary]
